# Supplementary material
Source: publisher site journal article supplement (https://www.dovepress.com/article/569909)
Supplement: Supplementary file 1 [file 569909%20Revised%20Appendix%201.pdf]

## Appendix 1: Interview Guide

| Domain/Topic                                                                         | Interview Questions/Prompts                                                                                                                                                                                                                                                                                                                                |
|--------------------------------------------------------------------------------------|------------------------------------------------------------------------------------------------------------------------------------------------------------------------------------------------------------------------------------------------------------------------------------------------------------------------------------------------------------|
| <b>Background—<br/>Diagnosis, VBT<br/>Decision, Post-<br/>Surgery<br/>Experience</b> | Do you remember how old you were when you received your scoliosis surgery?                                                                                                                                                                                                                                                                                 |
|                                                                                      | Can you think back to the time when you were first diagnosed with scoliosis and tell me about your experience?                                                                                                                                                                                                                                             |
|                                                                                      | Can you tell me about you/your families experience deciding to undergo VBT?<br>-How involved were you during decision-making? Was it more of a parental decision?<br>-Do you remember how your family/health care providers discussing the options with you?<br>-Do you remember how you/your family compared VBT with PSF? [Risks? Benefits? Trade-offs?] |
|                                                                                      | What were you/your families’ main reasons for choosing VBT? Do you remember what influenced the decision?                                                                                                                                                                                                                                                  |
|                                                                                      | Thinking back before surgery, how did you define surgical success? What were you hoping would be successful outcomes of the surgery?                                                                                                                                                                                                                       |
|                                                                                      | Now let’s talk about your experience after surgery. Tell me about life right after surgery and what you remember about your hospital stay.<br>-How did you cope physically during your hospital stay?<br>-How did you cope emotionally during your hospital stay?                                                                                          |
|                                                                                      | Can you tell me about your rehabilitation and recovery journey after the hospital when you were back at home?<br>-How did you copy physically during recovery at home?<br>-How did you cope emotionally during recovery at home?                                                                                                                           |
|                                                                                      | Have you had a revision surgery? If so, tell me about that experience.                                                                                                                                                                                                                                                                                     |

**Transition:** Next, are some questions about your satisfaction with the outcomes of surgery.

| Domain/Topic                                                                                                                                                                                                          | Interview Questions/Prompts                                                                                                                                                                                                                               |
|-----------------------------------------------------------------------------------------------------------------------------------------------------------------------------------------------------------------------|-----------------------------------------------------------------------------------------------------------------------------------------------------------------------------------------------------------------------------------------------------------|
| <b>Satisfaction with<br/>Outcomes<br/>Achieved</b><br>What are patients’<br>impressions about<br>the outcomes<br>achieved?<br><br><b>Expectation<br/>Dis/Confirmation</b><br>How are<br>expectations met or<br>unmet? | <b><i>Symptoms</i></b>                                                                                                                                                                                                                                    |
|                                                                                                                                                                                                                       | Are you currently experiencing things that you believe are a result of your surgery? [any pain, shortness of breath, numbness, hot/cold sensation, tingling]                                                                                              |
|                                                                                                                                                                                                                       | If experiencing symptoms/things: What do you believe is causing these things? Why do you believe this? How do you cope/manage these things?                                                                                                               |
|                                                                                                                                                                                                                       | Thinking back to any symptoms you had before surgery, how have your symptoms changed since surgery?                                                                                                                                                       |
|                                                                                                                                                                                                                       | Are you satisfied with the relief of symptoms? Can you explain why you feel that way?                                                                                                                                                                     |
|                                                                                                                                                                                                                       | <b><i>Function</i></b>                                                                                                                                                                                                                                    |
|                                                                                                                                                                                                                       | Are you satisfied with your ability to perform <b>daily activities of living</b> ? Can you explain why you feel that way? Do you have to make any accommodations to perform daily activities?                                                             |
|                                                                                                                                                                                                                       | Beyond daily activities, are you satisfied with your ability to do the <b>activities you enjoy, such as sport or recreational activities</b> ? Can you explain why you feel that way? Do you have to make any accommodations to perform these activities? |
| Are there any activities you’d like to do that you can’t do?                                                                                                                                                          |                                                                                                                                                                                                                                                           |

**Probes:** Tell me about it, Take me through the experience, Can you say more about that, What do you mean, I’m not sure I’m following you, Would you explain that

|  |                                                                                                                                                                                     |
|--|-------------------------------------------------------------------------------------------------------------------------------------------------------------------------------------|
|  | Thinking back to your expectations before surgery and where you are at now, are you satisfied with your ability to perform activities? In what ways?                                |
|  | How confident are you in the strength of your back? How much confidence do you have in the strength of the tethers in your back?                                                    |
|  | Do you do things to protect your back/tether?                                                                                                                                       |
|  | <b><i>Cosmesis and Self-Image</i></b>                                                                                                                                               |
|  | Are you satisfied with your body's appearance? [rib prominence, uneven shoulders, asymmetric waistline, postoperative scars] Can you explain why you feel that way?                 |
|  | Thinking back to your expectations before surgery and where you are at now, were your expectations for the way your body looks [back, shoulders, waist] met or unmet? In what ways? |
|  | How has your self-image changed since surgery?                                                                                                                                      |

**Transition:** Next are some questions about your overall satisfaction with your surgery.

| Domain/Topic                | Interview Questions/Prompts                                                                            |
|-----------------------------|--------------------------------------------------------------------------------------------------------|
| <b>Overall Satisfaction</b> | How satisfied are you with the overall results of your surgery? Can you explain why you feel that way? |
|                             | What would it take to make you more satisfied with the results of your surgery?                        |

**Transition:** We're almost finished—the next set of questions are about how you reflect on the decisions you made.

| Domain/Topic                                                                      | Interview Questions/Prompts                                                          |
|-----------------------------------------------------------------------------------|--------------------------------------------------------------------------------------|
| <b>Decision Reflection</b><br>How do patients reflect on the decisions they made? | Do you have any regrets about the decision to undergo VBT? Why/why not?              |
|                                                                                   | At this stage, what's your definition of success/how do you define surgical success? |
|                                                                                   | Do you consider your surgery a success? Why or why not?                              |
|                                                                                   | Do you still worry about your scoliosis today? [Describe what worries you.]          |
|                                                                                   | Do you worry more or less about it than before surgery?                              |

| Domain/Topic   | Interview Questions/Prompts                                                                      |
|----------------|--------------------------------------------------------------------------------------------------|
| <b>Wrap-up</b> | Before we wrap up, is there anything we didn't cover that you think is important for us to know? |

---

**Probes:** Tell me about it, Take me through the experience, Can you say more about that, What do you mean, I'm not sure I'm following you, Would you explain that
